# Supplementary material
Source: publisher figshare collection journal article supplement (https://tandf.figshare.com/articles/dataset/_/7058045)
Supplement: Supplementary file 2 [file 1]

Archive with 2 entries (2 files):
- tost_a_1489908_sm6543.pdf
- tost_a_1489908_sm2542.pdf
