# Supplementary material
Source: publisher figshare collection journal article supplement (https://tandf.figshare.com/articles/dataset/_/7058045)
Supplement: Supplementary file 2 [file 1 › tost_a_1489908_sm6543.pdf]

## Supplementary Information

### Urban bird trends in a rapidly growing tropical city

Dan Chamberlain, Micheal Kibuule, Roger Q Skeen and Derek Pomeroy  
Ostrich 2018, 89(3): 275–280. <https://doi.org/10.2989/00306525.2018.1489908>

**Appendix S1:** Examples of selected species classed as showing positive, negative and varied trends over time.

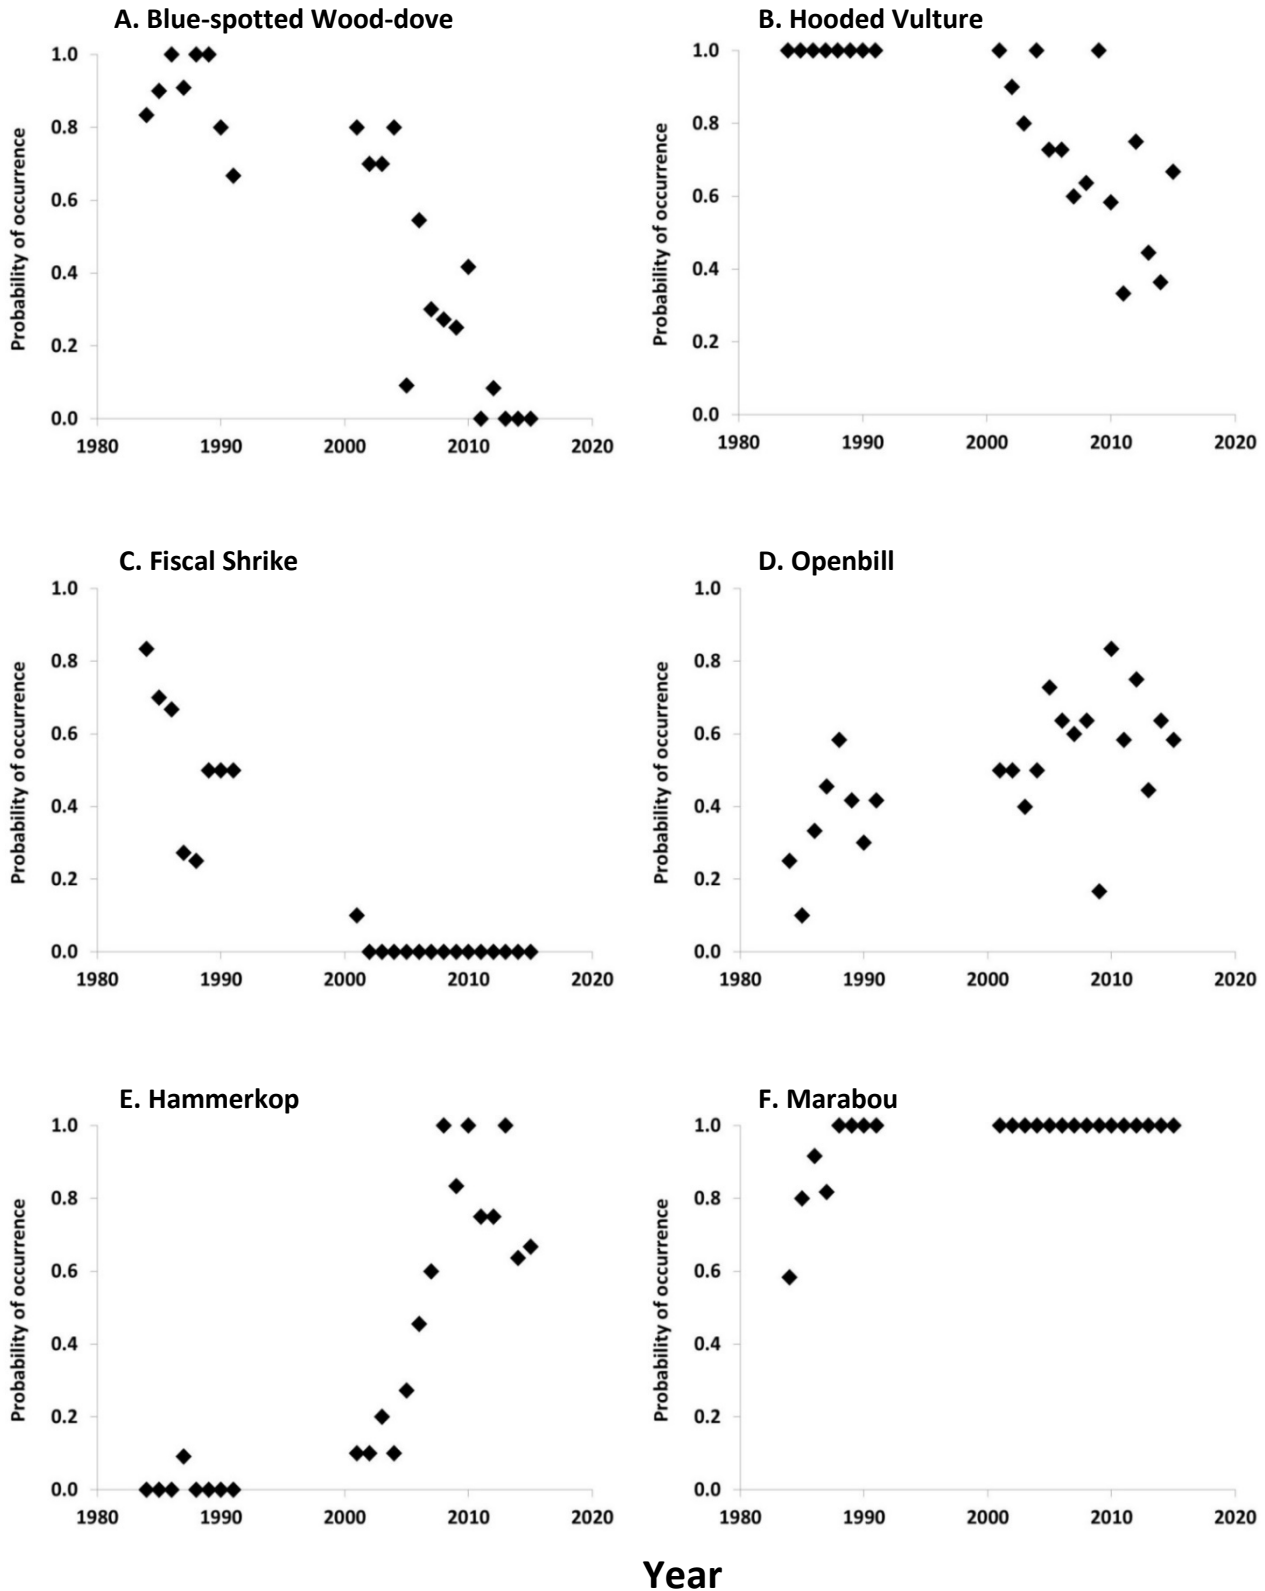

**Figure A1:** The probability of occurrence expressed as the number of months present as a proportion of the number of months surveyed per year for selected species representative of typical patterns of change in occurrence over time: A-C represent general declines, where B and C are significant period\*year interactions; D-F represent general increases, where E and F are significant period\*year interactions.

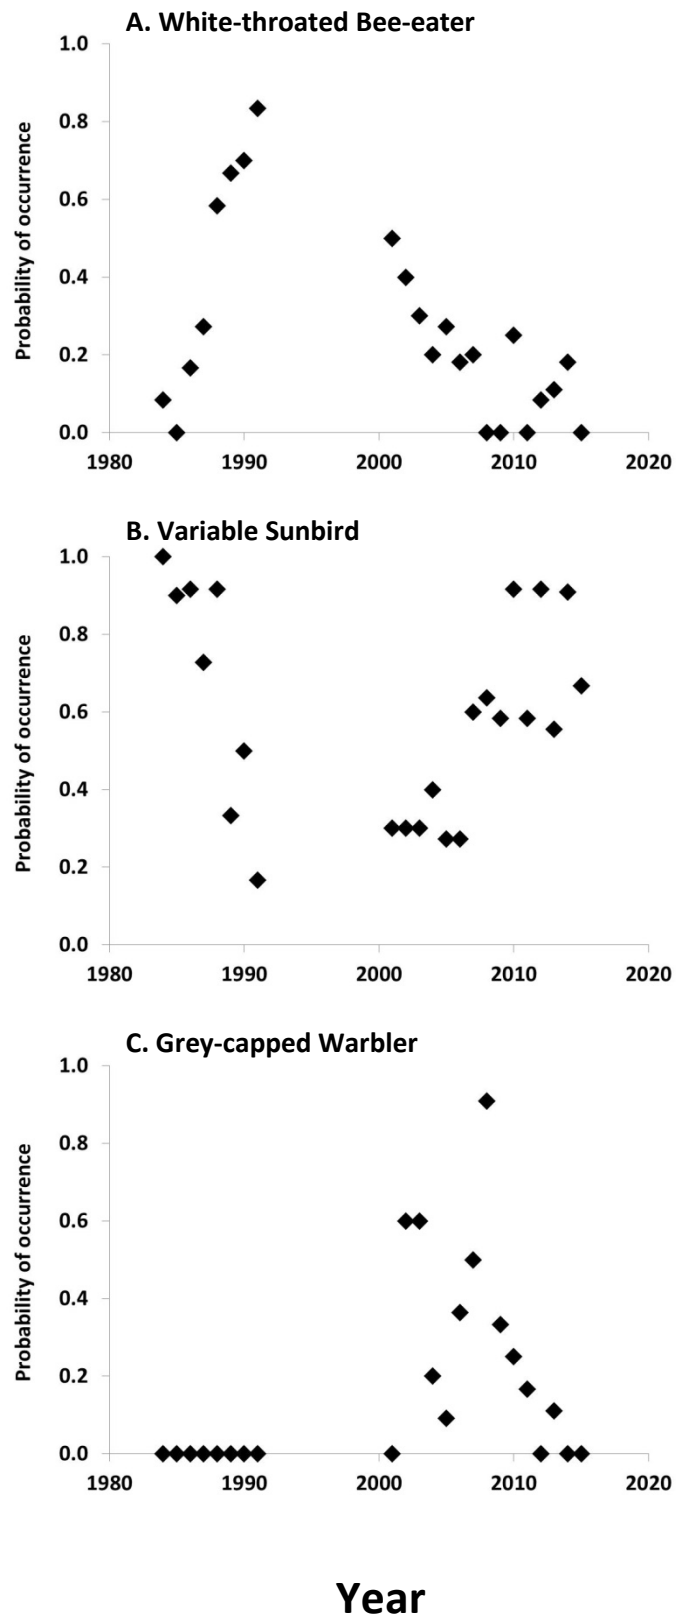

**Figure A2:** The probability of occurrence expressed as the number of months present as a proportion of the number of months surveyed per year for selected species that were classed as showing varied trends. Each species showed significant interactions between year and period, and showed clearly contrasting trends: A increase-decrease, B decrease-increase, C absent-decrease.

**Appendix S2:** A summary of trends over the two periods (early = 1984 to 1991; late = 2001 to 2015) for the 83 most frequently occurring species (present on at least 10% of monthly visits over the whole period). Diet is classified as predominantly frugivorous (F), granivorous (G), insectivorous (I), nectivorous (N), omnivorous (O), or carnivorous, divided into predators (P) and scavengers (S). Frequency is calculated as the number of months present as a proportion of the total months surveyed (n = 254) over the whole study period. General trends for the whole period were defined as described in the text.

**Table A1:** A summary of trends in the probability of occurrence of species (based on results from logistic regression) showing no significant interaction, hence trends are expressed over the whole study period (1984 to 2015). NS indicates no significant trend over time.

| Species                                                 | Diet | General trend | Frequency |
|---------------------------------------------------------|------|---------------|-----------|
| Cattle Egret <i>Bubuculus ibis</i>                      | I    | NS            | 0.98      |
| Black-headed Heron <i>Ardea melanocephala</i>           | P    | Increase      | 0.38      |
| Open-billed Stork <i>Anastomus lamelligerus</i>         | P    | Increase      | 0.50      |
| Palm-nut Vulture <i>Gypohierax angolensis</i>           | S    | NS            | 0.28      |
| Harrier Hawk <i>Polyboroides typus</i>                  | P    | NS            | 0.13      |
| Lizard Buzzard <i>Kaupifalco monogrammicus</i>          | P    | Increase      | 0.76      |
| Common Buzzard <i>Buteo buteo</i>                       | P    | NS            | 0.13      |
| Kestrel <i>Falco tinnunculus</i>                        | P    | Increase      | 0.37      |
| African Hobby <i>Falco cuvieri</i>                      | I    | Increase      | 0.27      |
| Green Pigeon <i>Treron calvus</i>                       | F    | NS            | 0.52      |
| Blue-spotted Wood Dove <i>Turtur afer</i>               | G    | Decrease      | 0.52      |
| Laughing Dove <i>Streptopelia senegalensis</i>          | G    | Increase      | 0.35      |
| Grey Parrot <i>Psittacus erithacus</i>                  | F    | Increase      | 0.35      |
| Brown Parrot <i>Poicephalus meyeri</i>                  | F    | NS            | 0.91      |
| Red-chested Cuckoo <i>Cuculus solitarius</i>            | I    | Decrease      | 0.11      |
| Klaas' Cuckoo <i>Chrysococcyx klaas</i>                 | I    | Decrease      | 0.42      |
| Didric Cuckoo <i>Chrysococcyx caprius</i>               | I    | NS            | 0.11      |
| Verreaux's Eagle Owl <i>Bubo lacteus</i>                | P    | NS            | 0.14      |
| Little Swift <i>Apus affinis</i>                        | I    | Decrease      | 0.65      |
| Woodland Kingfisher <i>Halcyon senegalensis</i>         | I    | NS            | 0.97      |
| Broad-billed Roller <i>Eurystomus glaucurus</i>         | I    | NS            | 0.19      |
| Crowned Hornbill <i>Lophoceros alboterminatus</i>       | F    | Increase      | 0.20      |
| Grey Woodpecker <i>Mesopicos goertae</i>                | I    | Decrease      | 0.75      |
| Angola Swallow <i>Hirundo angolensis</i>                | I    | NS            | 0.15      |
| White-browed Robin Chat <i>Cossypha heuglini</i>        | F    | NS            | 0.95      |
| African Thrush <i>Turdus pelios</i>                     | O    | NS            | 0.94      |
| Pied Crow <i>Corvus albus</i>                           | O    | NS            | 1.00      |
| Red-faced Cisticola <i>Cisticola erythrops</i>          | I    | Decrease      | 0.63      |
| Tawny-flanked Prinia <i>Prinia subflava</i>             | I    | NS            | 0.74      |
| Willow Warbler <i>Phylloscopus trochilus</i>            | I    | Decrease      | 0.15      |
| Green-throated Sunbird <i>Chalcomitra rubescens</i>     | N    | Decrease      | 0.20      |
| Collared Sunbird <i>Anthodiaeta collaris</i>            | N    | Decrease      | 0.14      |
| Olive-bellied Sunbird <i>Cinnyris chloropygius</i>      | N    | Decrease      | 0.47      |
| Copper Sunbird <i>Cinnyris cupreus</i>                  | N    | Increase      | 0.17      |
| Black-headed Gonolek <i>Laniarius erythrogaster</i>     | I    | Decrease      | 0.64      |
| Black-headed Oriole <i>Oriolus brachyrynchus</i>        | I    | Decrease      | 0.10      |
| Drongo <i>Dicrurus adsimilis</i>                        | I    | Decrease      | 0.47      |
| Splendid Glossy Starling <i>Lamprotornis splendidus</i> | F    | Increase      | 0.84      |
| Black-headed Weaver <i>Ploceus cucullatus</i>           | G    | Decrease      | 0.66      |
| Black Bishop <i>Euplectes gierowii</i>                  | G    | Decrease      | 0.13      |
| Bronze Mannikin <i>Spermestes cucullata</i>             | G    | Decrease      | 0.53      |

**Table A2:** A summary of trends in the probability of occurrence of species (based on results from logistic regression) showing a significant interaction between period and year (as defined in the text). Stable indicates little variation, either due to almost complete absence ('Stable – scarce') or almost always present ('Stable – common').

| Species                                                           | Diet | General trend | Early           | Late            | Frequency |
|-------------------------------------------------------------------|------|---------------|-----------------|-----------------|-----------|
| Hamerkop <i>Scopus umbretta</i>                                   | P    | Increase      | Stable - scarce | Increase        | 0.37      |
| Marabou Stork <i>Leptoptilos crumeniferus</i>                     | S    | Increase      | Increase        | 100%            | 0.96      |
| Hadada <i>Bostrychia hagedash</i>                                 | I    | NS            | Stable - common | NS              | 1.00      |
| Yellow-billed Kite <i>Milvus aegyptius</i>                        | S    | NS            | Stable - common | Stable - common | 1.00      |
| Hooded Vulture <i>Necrosyrtes monachus</i>                        | S    | Decrease      | Stable - common | Decrease        | 0.81      |
| African Goshawk <i>Accipiter tachiro</i>                          | P    | Increase      | NS              | Increase        | 0.19      |
| Shikra <i>Accipiter badius</i>                                    | P    | Increase      | Increase        | NS              | 0.72      |
| Speckled Pigeon <i>Columba guinea</i>                             | G    | Increase      | Stable - scarce | Increase        | 0.54      |
| Feral Pigeon <i>Columba livia domestica</i>                       | G    | Increase      | NS              | Increase        | 0.51      |
| Red-eyed Dove <i>Streptopelia semitorquata</i>                    | G    | NS            | NS              | Stable - common | 1.00      |
| Ross's Turaco <i>Musophaga rossae</i>                             | F    | NS            | Stable - common | NS              | 0.84      |
| White-browed Coucal <i>Centropus superciliosus</i>                | I    | Decrease      | NS              | Decrease        | 0.34      |
| Speckled Mousebird <i>Colius striatus</i>                         | F    | Decrease      | Decrease        | Decrease        | 0.53      |
| White-throated Bee-eater <i>Merops albicollis</i>                 | I    | Interaction   | Increase        | Decrease        | 0.26      |
| Eurasian Bee-Eater <i>Merops apiaster</i>                         | I    | Interaction   | Decrease        | Increase        | 0.11      |
| Black and White Casqued Hornbill <i>Bycanistes subcylindricus</i> | O    | NS            | Stable - common | NS              | 0.81      |
| Yellow-rumped Tinkerbird <i>Pogoniulus bilineatus</i>             | F    | Decrease      | Stable - common | Decrease        | 0.41      |
| Yellow-fronted Tinkerbird <i>Pogoniulus chrysoconus</i>           | F    | Interaction   | Decrease        | Increase        | 0.63      |
| Double-toothed Barbet <i>Pogonornis bidentatus</i>                | F    | Decrease      | Decrease        | NS              | 0.84      |
| Grey-backed Camaroptera <i>Camaroptera brachyura</i>              | I    | NS            | Stable - common | NS              | 0.99      |
| Grey-capped Warbler <i>Eminia lepida</i>                          | I    | Interaction   | Stable - scarce | Decrease        | 0.17      |
| Black Flycatcher <i>Melaenornis edoloides</i>                     | I    | Decrease      | Decrease        | NS              | 0.68      |
| Paradise Flycatcher <i>Terpsiphone viridis</i>                    | I    | Interaction   | Increase        | Decrease        | 0.57      |
| Black-and-White Shrike-flycatcher <i>Bias musicus</i>             | I    | Interaction   | Increase        | Decrease        | 0.33      |
| Brown-throated Wattle-eye <i>Platysteira cyanea</i>               | I    | Decrease      | NS              | Decrease        | 0.38      |
| Brown Babbler <i>Turdoides plebejus</i>                           | I    | Decrease      | Decrease        | Stable - scarce | 0.11      |
| Green-headed Sunbird <i>Cyanomitra verticalis</i>                 | N    | Decrease      | Decrease        | Decrease        | 0.26      |
| Scarlet-chested Sunbird <i>Chalcomitra senegalensis</i>           | N    | NS            | Stable - common | NS              | 0.98      |
| Mariqua Sunbird <i>Cinnyris mariquensis</i>                       | N    | Decrease      | Decrease        | NS              | 0.29      |

|                                                                        |   |             |                 |                 |      |
|------------------------------------------------------------------------|---|-------------|-----------------|-----------------|------|
| Variable Sunbird <i>Cinnyris venustus</i>                              | N | Interaction | Decrease        | Increase        | 0.60 |
| Fiscal <i>Lanius collaris</i>                                          | I | Decrease    | Decrease        | Stable - scarce | 0.19 |
| Northern Puffback <i>Dryoscopus gambensis</i>                          | I | Increase    | Increase        | NS              | 0.71 |
| Tropical Boubou <i>Laniarius aethiopicus</i>                           | I | Increase    | Increase        | NS              | 0.44 |
| Ruppell's Long-tailed Glossy Starling <i>Lamprotornis purpuroptera</i> | F | Increase    | Increase        | NS              | 0.92 |
| Grey-headed Sparrow <i>Passer griseus</i>                              | G | NS          | Stable - common | Stable - common | 0.98 |
| Baglafecht Weaver <i>Ploceus baglafecht</i>                            | G | Decrease    | Decrease        | Decrease        | 0.42 |
| Spectacled Weaver <i>Ploceus ocularis</i>                              | G | Decrease    | Decrease        | Decrease        | 0.22 |
| Grey-headed Negrofinch <i>Nigrita canicapillus</i>                     | G | Increase    | Increase        | Stable - scarce | 0.20 |
| Red-billed Firefinch <i>Lagonosticta senegala</i>                      | G | Decrease    | Decrease        | NS              | 0.52 |
| Black-crowned Waxbill <i>Estrilda nonnula</i>                          | G | Decrease    | NS              | Decrease        | 0.11 |
| Red-cheeked Cordon Bleu <i>Uraeginthus bengalus</i>                    | G | Increase    | Stable - scarce | Increase        | 0.15 |
| Yellow-fronted Canary <i>Crithagra mozambica</i>                       | G | Decrease    | NS              | Decrease        | 0.27 |
